# Supplementary material for: Label-free fluorescent assay for real-time monitoring site-specific DNA cleavage by EcoRI endonuclease
Source: Royal Society of Chemistry journal article supplement (doi:10.1039/c2an16287c), 2012-01-01
Supplement: c2an16287c.pdf [file c2an16287c.pdf]

## **Electronic Supplementary Information**

### **Label-free fluorescent assay for real-time monitoring site-specific**

### **DNA cleavage by EcoRI endonuclease**

Jing Deng, Yan Jin<sup>\*a</sup>, Guozhen Chen, and Lin Wang

Key Laboratory of Applied Surface and Colloid Chemistry, Ministry of Education, Key Laboratory of Analytical Chemistry for Life Science of Shaanxi Province, School of Chemistry and Chemistry Engineering Shaanxi Normal University, Xi'an 710062, China. Fax: (+) 86-29-81530727; E-mail: jinyan@snnu.edu.cn

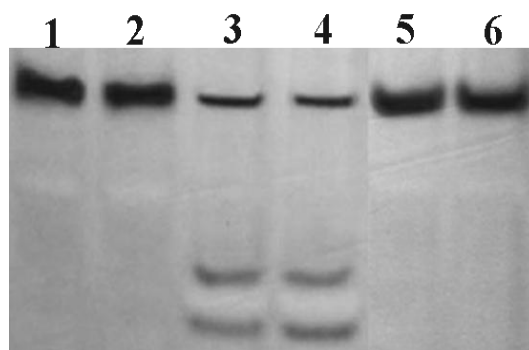

**Fig. S1** Electrophoresis analysis of cleavage of dsDNA1 by restriction enzyme. Lane1. 18mer dsDNA1, Lane2. 18mer dsDNA1, Lane3. cleaved dsDNA1 by EcoRI, Lane4. cleaved dsDNA1 by EcoRI. Lane5. cleaved dsDNA1 by BamHI, Lane6. cleaved dsDNA1 by BamHI. The reaction mixture consisted of 5.0  $\mu\text{M}$  dsDNA1 in buffer (50 mM Tris-HCl, 100 mM NaCl, 10 mM  $\text{MgCl}_2$ , and 0.1mg BSA, pH 7.5) and 10 U  $\mu\text{L}^{-1}$  EcoR I. In the gel electrophoresis assays, the 20  $\mu\text{L}$  sample was incubated at 37  $^\circ\text{C}$ . Subsequently, the samples were applied to a polyacrylamide gel (18%). The electrophoresis was carried in 1 $\times$ TBE (pH 8.0) at 300 V constant voltage for 1 h. The gels were silver-stained.

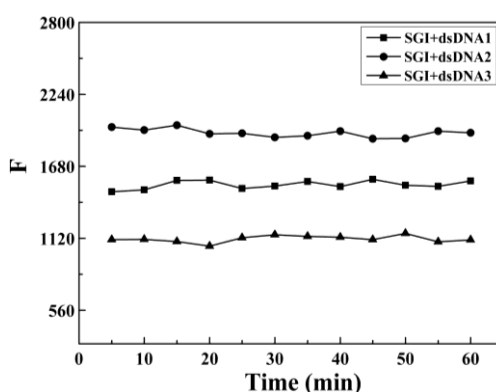

**Fig. S2** Fluorescence intensity of SGI/dsDNAs with the prolonging of reacting time at 37 $^\circ\text{C}$ .

**Table S1** Effect of salt concentration on the activity of EcoRI

| Reaction medium                                 | S(SGI+dsDNA1)/ B (SGI) | Cleavage fraction (%) |
|-------------------------------------------------|------------------------|-----------------------|
| 50 mM Tris-HCl                                  | 3.31                   | 9.24%                 |
| 50 mM Tris-HCl, 50mM NaCl, 5mM $\text{MgCl}_2$  | 3.5                    | 17.48%                |
| 50 mM Tris-HCl 100mM NaCl, 10mM $\text{MgCl}_2$ | 41.06                  | 47.39%                |
| 50 mM Tris-HCl 150mM NaCl, 15mM $\text{MgCl}_2$ | 15.54                  | 34.53%                |
